# Supplementary material for: Extended exposure to elevated temperature affects escape response behaviour in coral reef fishes
Source: PeerJ. 2017 Aug 18;5:e3652. doi: 10.7717/peerj.3652 (PMC5564382; doi:10.7717/peerj.3652)
Supplement: Supplemental Information 1 — Percentages, means, and standard deviations for responsiveness (percent of reactions), directionality (percent of turns), response latency (ms), max speed (body lengths s−1), and response distance (cm). [file peerj-05-3652-s001.xlsx]

## Sheet: Sheet1
Species	Tank#	Standard Length	Holding temp (C)	Test temp (C)	Exposure duration	Attempt#	Responsiveness	Directionality	Start distance to stimulus (cm)	Latency (ms)	Max speed (Bl/s)	Response distance (cm)
P. amboinensis	38	36.08	29	29	4d	1	Avoid	No reaction
P. amboinensis	39	39.96	29	29	4d	1	C-start	Away	3.98	8.3	3.17067	3.08
P. amboinensis	40		29	29	4d	1	C-start	Away	2.7	6.64		2.67
P. amboinensis	65	26.1	29	29	4d	3	C-start	Away	2.26	4.98	5.81609	2.1
P. amboinensis	65	24.02	29	29	4d	2	C-start	Away	1.36	4.98	4.37136	1.07
P. amboinensis	65	29.56	29	29	4d	1	C-start	Away	5.66	4.98	4.89513	1.73
P. amboinensis	204	22.62	29	29	4d	2	C-start	Away	4.817	19.92	7.49337	2.25
P. amboinensis	204	40.2	29	29	4d	2	C-start	Away	1.132	6.64	3.18657	3.45
P. amboinensis	204	31.24	29	29	4d	2	C-start	Away	4.519	9.96	3.84123	2.69
P. amboinensis	207	26.22	29	29	4d	1	C-start	Away	4.163	33.2	6.66285	2.41
P. amboinensis	207	33.72	29	29	4d	1	No reaction	No reaction
P. amboinensis	209	28.24	29	29	4d	2	C-start	Towards	4.785	3.32	4.57153	2.38
P. amboinensis	209	33.06	29	29	4d	1	C-start	Away	4.491	9.96	4.56745	3.55
P. amboinensis	207	33.72	29	30	4d	1	C-start	Towards	2.506	9.96	6.26928	2.97
P. amboinensis	207	26.22	29	30	4d	4	C-start	Away	3.758	9.96	6.43783	2.69
P. amboinensis	204	40.2	29	30	4d	2	C-start	Towards	7.19	14.94	4.27363	2.68
P. amboinensis	204	31.24	29	30	4d	1	C-start	Towards	5.17	6.64	4.89117	1.97
P. amboinensis	204	22.62	29	30	4d	1	No reaction	No reaction
P. amboinensis	39	39.96	29	30	4d	1	C-start	Away	6.275	11.62	5.14765	5.45
P. amboinensis	209	28.24	29	30	4d	1	C-start	Away	3.51	4.98	4.11473	2.03
P. amboinensis	209	33.06	29	30	4d	1	C-start	Away	9.215	3.32	6.1222	3.3
P. amboinensis	38	36.08	29	30	4d	2	C-start	Away	4.415	6.64	5.40743	2.86
P. amboinensis	38	27.68	29	30	4d	1	C-start	Away	4.817	4.98	4.75072	1.58
P. amboinensis	65	29.56	29	30	4d	1	C-start	Towards	6.698	13.28	4.61434	2.28
P. amboinensis	65	24.02	29	30	4d	2	C-start	Away	6.762	8.3	5.49958	1.9
P. amboinensis	65	26.1	29	30	4d	1	C-start	Away	0.857	14.94	3.5977	2.36
P. amboinensis	189	22.48	30	30	90d	1	C-start	Away	4.327	33.2	6.76157	3
P. amboinensis	189	21.48	30	30	90d	1	C-start	Towards	2.34	14.94	8.93855	4.61
P. amboinensis	214	30.06	30	30	90d	3	C-start	Towards	1.12	13.28	5.60878	2.77
P. amboinensis	214	24.72	30	30	90d	1	C-start	Away	9.078	3.32	6.08414	2.01
P. amboinensis	215	30.2	30	30	90d	1	C-start	Away	6.978	8.3	3.94371	2.17
P. amboinensis	215	27.22	30	30	90d	2	C-start	Away	1.951	46.48	3.13373	2.36
P. amboinensis	237	39.62	30	30	90d	1	Avoid	No reaction
P. amboinensis	237	34.14	30	30	90d	1	No reaction	No reaction
P. amboinensis	237	25.62	30	30	90d	1	Avoid	No reaction
P. amboinensis	238	32.08	30	30	90d	1	C-start	Towards	3.332	4.98	5.18392	3.6
P. amboinensis	238	43.6	30	30	90d	1	No reaction	No reaction
P. amboinensis	244	26.18	30	30	90d	3	C-start	Away	4.501	14.94	4.54927	2.57
P. amboinensis	244	31.02	30	30	90d	1	C-start	Away	1.738	4.98	6.16054	2.53
P. amboinensis	244	34.82	30	30	90d	2	C-start	Towards	3.275	11.62	4.05514	2.44
P. amboinensis	204	31.24	29	31	4d	2	C-start	Towards	6.174	16.6	4.79834	2.32
P. amboinensis	65	26.1	29	31	4d	1	No reaction	Towards
P. amboinensis	65	29.56	29	31	4d	1	C-start	Away	2.006	13.28	3.51827	1.35
P. amboinensis	209	33.06	29	31	4d	1	C-start	Towards	1.515	3.32	2.2928	1.61
P. amboinensis	65	24.02	29	31	4d	1	C-start	Towards	2.05	9.96	5.22065	2.01
P. amboinensis	39	22.56	29	31	4d	2	C-start	Away	2.199	6.64	6.54699	2.55
P. amboinensis	207	33.72	29	31	4d	1	C-start	No reaction	6.409	6.64	4.22301	2.64
P. amboinensis	38	36.08	29	31	4d	1	C-start	Towards	3.45	9.96	4.55931	2.78
P. amboinensis	13	34.58	31	31	90d	1	Avoid	No reaction
P. amboinensis	25	45.5	31	31	90d	1	No reaction	No reaction
P. amboinensis	25	32.62	31	31	90d	1	C-start	Away	8.09	9.96	3.69099	2.49
P. amboinensis	26	21.88	31	31	90d	1	No reaction	No reaction
P. amboinensis	26	24.32	31	31	90d	1	C-start	Towards	8.035	4.98	5.01645	2.11
P. amboinensis	27	33.18	31	31	90d	1	Avoid	No reaction
P. amboinensis	28	24.72	31	31	90d	1	C-start	Towards	6.177	6.64	5.24676	1.94
P. amboinensis	28	33.92	31	31	90d	3	C-start	Away	3.812	4.98	5.02948	1.96
P. amboinensis	28	26.2	31	31	90d	2	C-start	Towards	3.545	4.98	7.38168	2.71
P. amboinensis	55	33.54	31	31	90d	2	C-start	Towards	1.766	6.64	3.08289	1.72
P. amboinensis	55	33.54	31	31	90d	1	C-start	Towards	10.73	13.28	6.76208	4.64
P. moluccensis	19	26.76	29	29	4d	3	C-start	Away	6.2	4.98	10.0897	2.4
P. moluccensis	19		29	29	4d	1	Avoid	No reaction
P. moluccensis	19	31.84	29	29	4d	2	C-start	Away	4.3	8.3	5.59045	3.4
P. moluccensis	19	24.74	29	29	4d	1	C-start	Away	4.55	6.64	4.95554	2.88
P. moluccensis	40	28.02	29	29	4d	3	C-start	Towards	1.39	4.98	3.80086	2.5
P. moluccensis	40	33.14	29	29	4d	1	C-start	Away	2.98	8.3	4.54436	2.44
P. moluccensis	40	22.48	29	29	4d	1	Avoid	No reaction
P. moluccensis	41	30.48	29	29	4d	1	Avoid	No reaction
P. moluccensis	41	27.52	29	29	4d	3	C-start	Away	2.97	9.96	1.92224	1.39
P. moluccensis	184	30.88	29	29	4d	2	C-start	Away	4.38	6.64	5.5829	2.3
P. moluccensis	184	27.06	29	29	4d	2	C-start	Away	2.6	21.58	3.77679	3.6
P. moluccensis	184	26.08	29	29	4d	1	C-start	Away	3.096	4.98	6.36887	2.1
P. moluccensis	186	27.66	29	29	4d	2	C-start	Towards	4.2	61.42	5.43384	2
P. moluccensis	186	27.4	29	29	4d	1	C-start	Towards	8	6.64	4.68613	2.03
P. moluccensis	186	23.08	29	29	4d	1	C-start	Towards	6.14	8.3	7.83795	1.77
P. moluccensis	206	28.38	29	29	4d	1	C-start	Towards	4.69	6.64	5.55321	2.09
P. moluccensis	206	19.76	29	29	4d	1	C-start	Away	3.309	6.64	8.52227	2.84
P. moluccensis	206	28.74	29	29	4d	1	C-start	Away	3.512	11.62	4.69381	2.38
P. moluccensis	208	27.36	29	29	4d	1	No reaction	No reaction
P. moluccensis	208	26.66	29	29	4d	2	C-start	Away	4.266	16.6	5.42761	2.28
P. moluccensis	228	27.88	29	29	4d	1	C-start	Away	5.156	13.28	6.83644	3.42
P. moluccensis	228	27.88	29	29	4d	2	C-start	Away	4.858	8.3	6.25179	3.14
P. moluccensis	228	32.06	29	29	4d	3	C-start	Away	3.689	3.32	4.30131	2.13
P. moluccensis	206	28.38	29	30	4d	2	C-start	Towards	2.756	6.64	5.93376	2.58
P. moluccensis	207	28.45	29	30	4d	1	C-start	Towards	2.5
P. moluccensis	206	28.74	29	30	4d	2	C-start	Towards	2.428	9.96	4.87126	2.28
P. moluccensis	206	19.76	29	30	4d	1	C-start	Away	4.142	4.98	7.44433	1.99
P. moluccensis	228	27.88	29	30	4d	3	C-start	Towards	1.112	4.98	5.78192	1.59
P. moluccensis	228	30.9	29	30	4d	1	C-start	Towards	1.25
P. moluccensis	228	27.88	29	30	4d	2	C-start	Away	4.5	6.64	5.12554	2.8
P. moluccensis	228	32.06	29	30	4d	1	C-start	Away	2.829	4.98	4.72551	1.69
P. moluccensis	40	28.02	29	30	4d	3	C-start	Away	6.263	9.96	5.23911	1.59
P. moluccensis	40	22.48	29	30	4d	1	C-start	Away	0.944	4.98	6.8194	2.24
P. moluccensis	40	33.14	29	30	4d	1	C-start	Away	2.082	4.98	4.36331	1.8
P. moluccensis	184	30.88	29	30	4d	2	C-start	Towards	7.085	6.64	3.95402	2.35
P. moluccensis	184	26.08	29	30	4d	2	C-start	Away	5.048	6.64	5.55982	2.08
P. moluccensis	184	27.06	29	30	4d	3	C-start	Towards	3.015	9.96	5.45085	1.79
P. moluccensis	195	22.46	30	30	90d	1	C-start	Towards	3.475	3.32	6.70525	1.33
P. moluccensis	195	29.78	30	30	90d	1	C-start	Away	2.58	6.64	4.88919	2.65
P. moluccensis	195	27.28	30	30	90d	1	C-start	Away	3.15	8.3	4.63343	1.45
P. moluccensis	200	30.16	30	30	90d	1	C-start	Away	6.489	6.64	5.05637	2.28
P. moluccensis	200	31.66	30	30	90d	1	C-start	Away	1.96	6.64	5.5717	1.78
P. moluccensis	201	24.52	30	30	90d	1	C-start	Away	2.65	4.98	7.99755	1.94
P. moluccensis	201	24.46	30	30	90d	1	Avoid	Away
P. moluccensis	217	29.72	30	30	90d	1	C-start	Towards	7.533	8.3	5.58883	3.18
P. moluccensis	217	31.84	30	30	90d	1	C-start	No reaction	3.14	6.64	6.42588	2.24
P. moluccensis	217	33.88	30	30	90d	1	C-start	Away	6.224	13.28	4.72845	3.11
P. moluccensis	221	32.22	30	30	90d	1	C-start	Away	4.766	3.32	6.34389	3.85
P. moluccensis	233	27.36	30	30	90d	1	C-start	Away	4.23	8.3	5.27047	2.74
P. moluccensis	233	26.8	30	30	90d	1	Avoid	No reaction
P. moluccensis	240	32.78	30	30	90d	1	No reaction	No reaction
P. moluccensis	240	29.22	30	30	90d	1	C-start	Away	5.613	13.28	4.64408	1.71
P. moluccensis	245	31.24	30	30	90d	1	Avoid	No reaction
P. moluccensis	245	26.86	30	30	90d	1	C-start	Towards	2.104	6.64	6.17647	2.7
P. moluccensis	41	30.48	29	31	4d	1	C-start	Away	4.506	8.3	6.03346	2.8
P. moluccensis	19	26.76	29	31	4d	3	C-start	Towards	3.14	4.98	6.02018	0.92
P. moluccensis	19	24.74	29	31	4d	1	C-start	Towards	3.65	6.64	6.41471	3.1
P. moluccensis	19		29	31	4d	2	C-start	Away	6.85	4.98		1.73
P. moluccensis	19	25.65	29	31	4d	1	C-start	Towards	3.56
P. moluccensis	186	27.4	29	31	4d	2	C-start	Away	1.332	9.96	4.14964	2.15
P. moluccensis	186	23.08	29	31	4d	1	C-start	Away	2.777	8.3	6.94107	3.2
P. moluccensis	186	27.66	29	31	4d	2	C-start	Towards	2.384	9.96	5.98337	2.78
P. moluccensis	208	27.36	29	31	4d	2	C-start	Towards	5.023	4.98	5.34357	3.1
P. moluccensis	208	26.66	29	31	4d	1	C-start	Towards	6.541	4.98	4.86872	2.07
P. moluccensis	23	32.58	31	31	90d	3	No reaction	No reaction
P. moluccensis	23	33.82	31	31	90d	1	No reaction	No reaction
P. moluccensis	23	27.5	31	31	90d	1	No reaction	No reaction
P. moluccensis	24	32.54	31	31	90d	1	No reaction	No reaction
P. moluccensis	24	21.58	31	31	90d	2	C-start	Away	6.533	4.98	4.7127	1.45
P. moluccensis	24	31.88	31	31	90d	1	No reaction	No reaction
P. moluccensis	30	33.02	31	31	90d	1	C-start	Away	3.893	3.32	5.05754	3.27
P. moluccensis	30	28.7	31	31	90d	1	C-start	Away	3.886	1.66	6.79443	1.97
P. moluccensis	30	33.1	31	31	90d	1	C-start	Towards	1.382	4.98	4.29909	2.6
P. moluccensis	30	24.48	31	31	90d	1	C-start	Away	4.478	4.98	5.30637	1.14
P. moluccensis	30	30.82	31	31	90d	1	C-start	Away	1.516	21.58	3.8806	1.8
P. moluccensis	31	31.78	31	31	90d	1	No reaction	No reaction
P. moluccensis	31	21.94	31	31	90d	1	No reaction	No reaction
P. moluccensis	31	34.66	31	31	90d	1	No reaction	No reaction
P. moluccensis	33	23.54	31	31	90d	1	Avoid	No reaction
P. moluccensis	34	24.42	31	31	90d	2	C-start	Away	7.648	6.64	4.82801	1.41
P. moluccensis	34	31.6	31	31	90d	1	C-start	Away	5.859	8.3	5.9462	3.4
P. moluccensis	34	21.86	31	31	90d	3	C-start	Towards	4.373	4.98	6.36322	2.08
P. moluccensis	66	32.66	31	31	90d	1	C-start	Away	4.575	4.98	5.68585	3.57
P. moluccensis	66	27.74	31	31	90d	1	C-start	Towards	4.917	8.3	6.33021	1.81
P. moluccensis	66	21.56	31	31	90d	1	C-start	Away	2.684	4.98	4.74026	2.13
